# Supplementary material
Source: Springer Nature journal article supplement (https://www.springermedizin.de/resource/supplementary/12967_2013_1704_MOESM2_ESM.pdf/9575238)

**Epithelial cell**

**T cell**

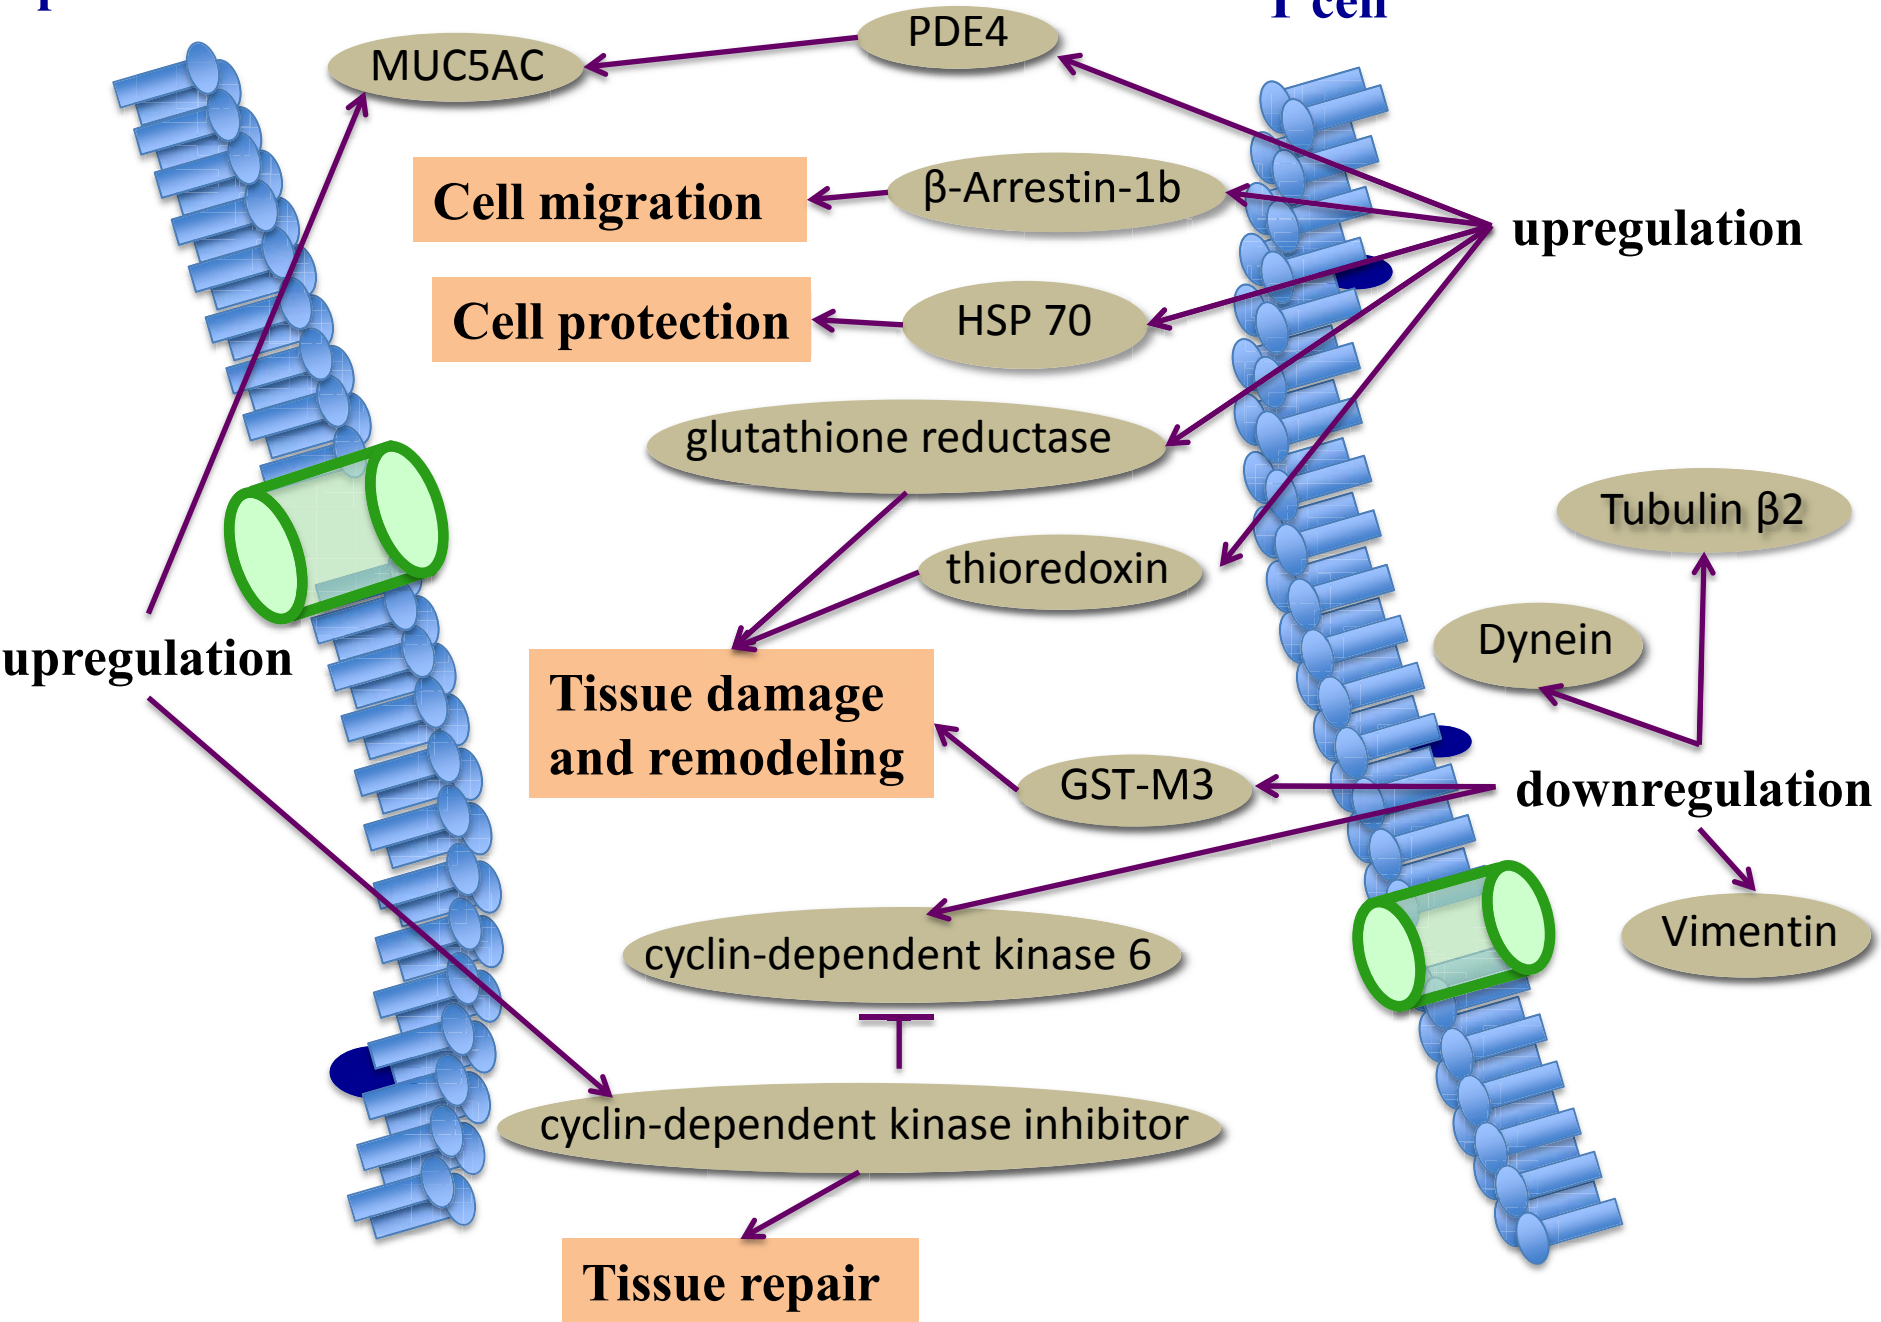

Supplement: MOESM2 [file 9575238]
